# Supplementary material for: Assisted Oocyte Activation With Calcium Ionophore Improves Pregnancy Outcomes and Offspring Safety in Infertile Patients: A Systematic Review and Meta-Analysis
Source: PubMed Central journal article supplement (PMC8819094; doi:10.3389/fphys.2021.751905), 2022-01-24

Supplemental Fig. 2A

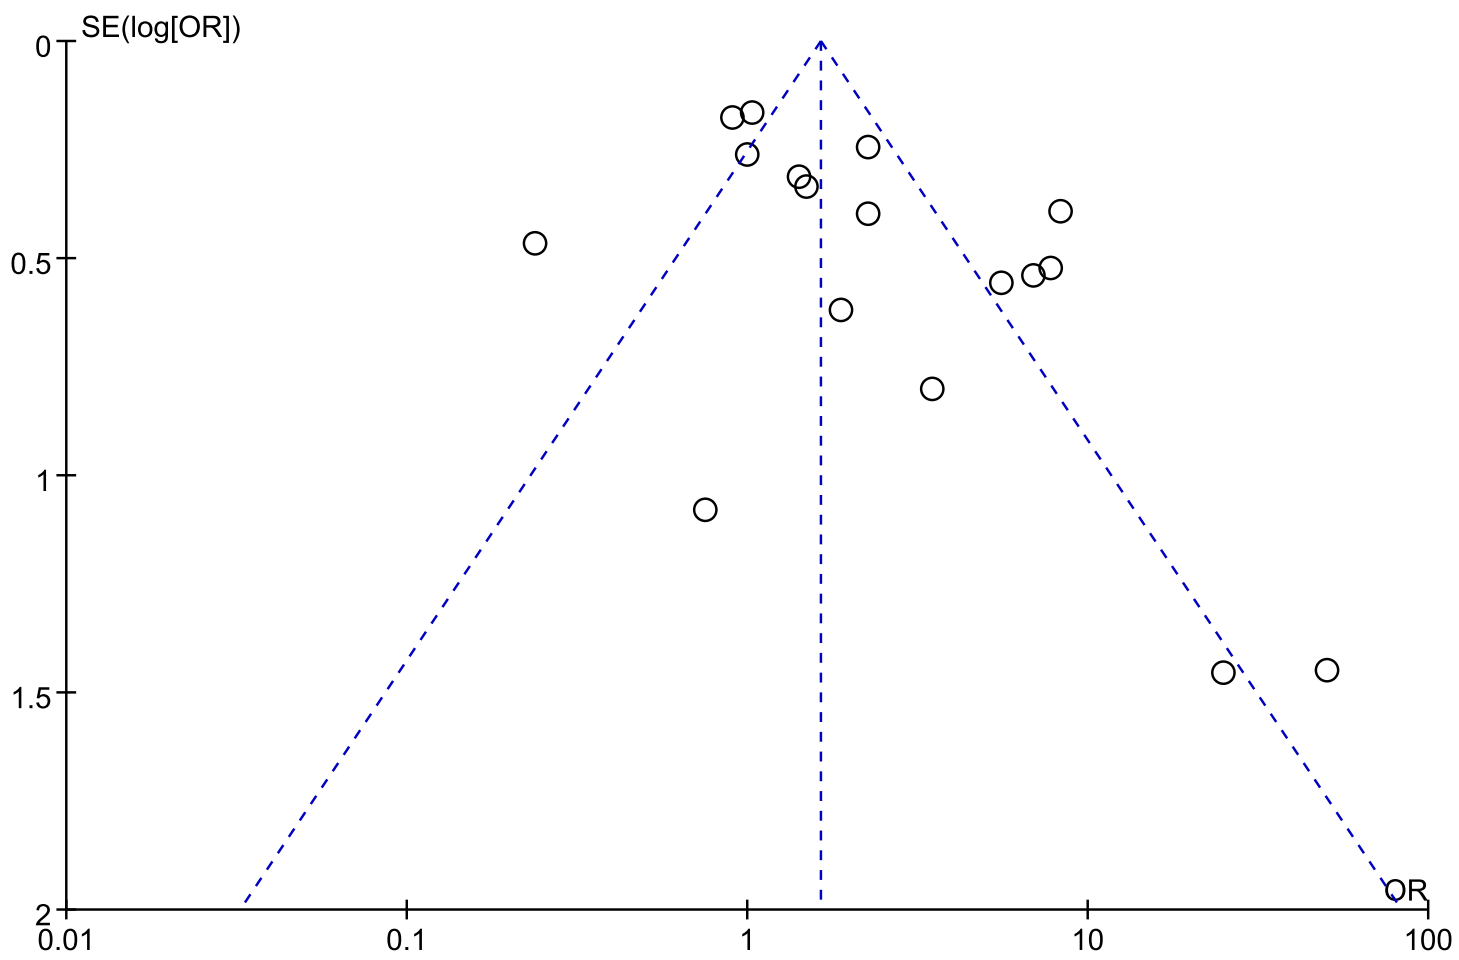

Supplemental Fig. 2B

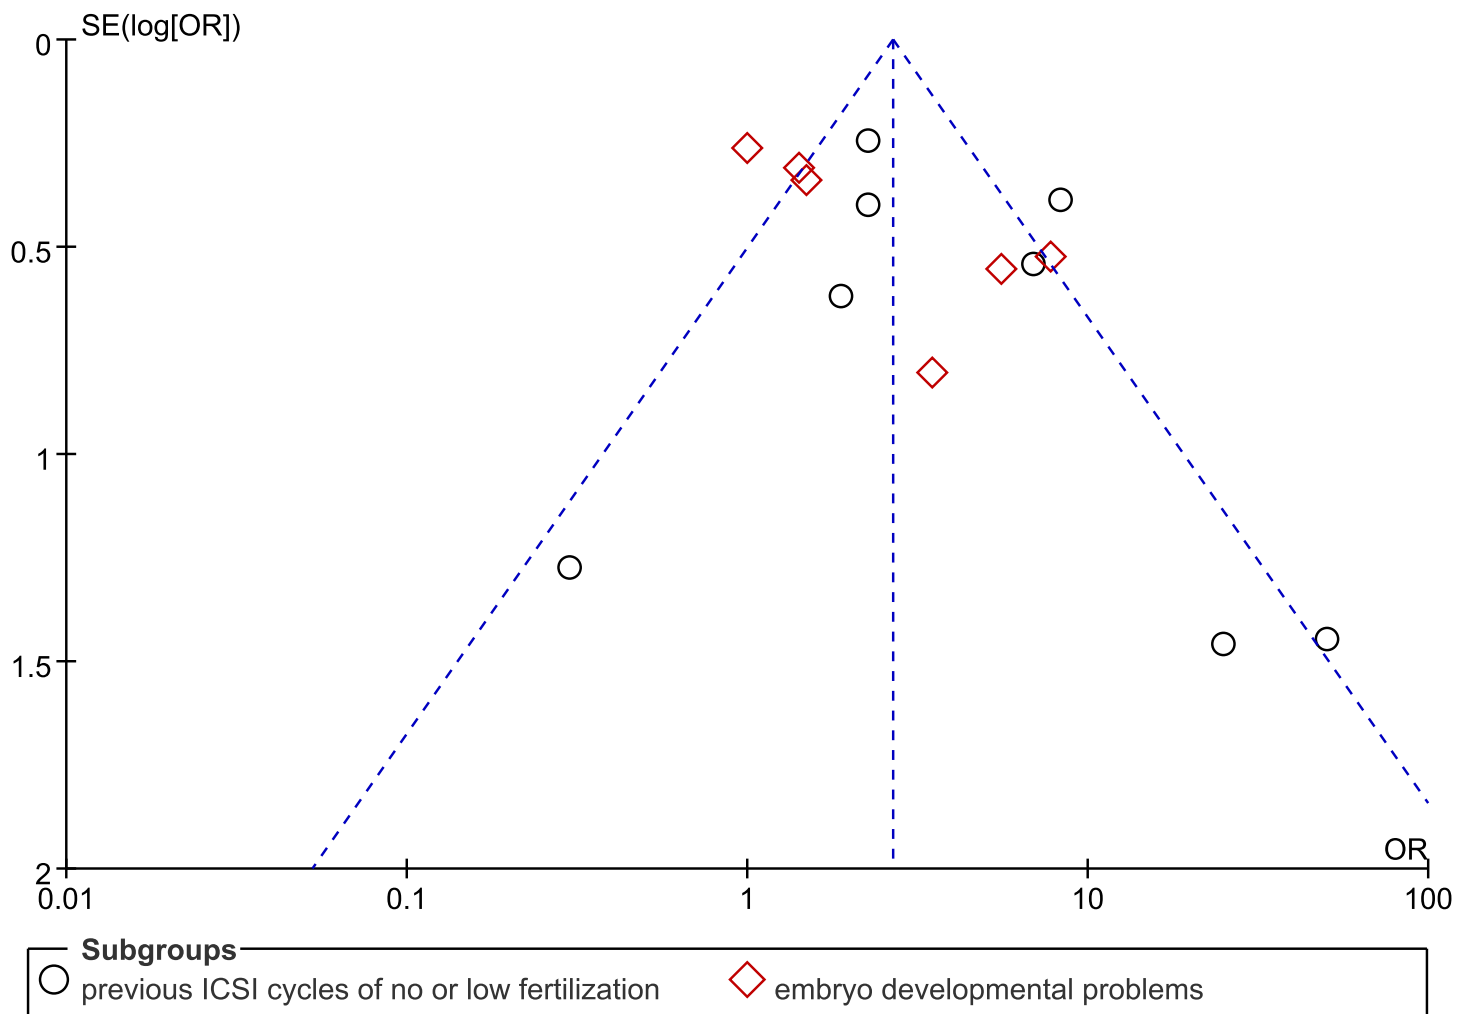

Supplemental Fig. 3A

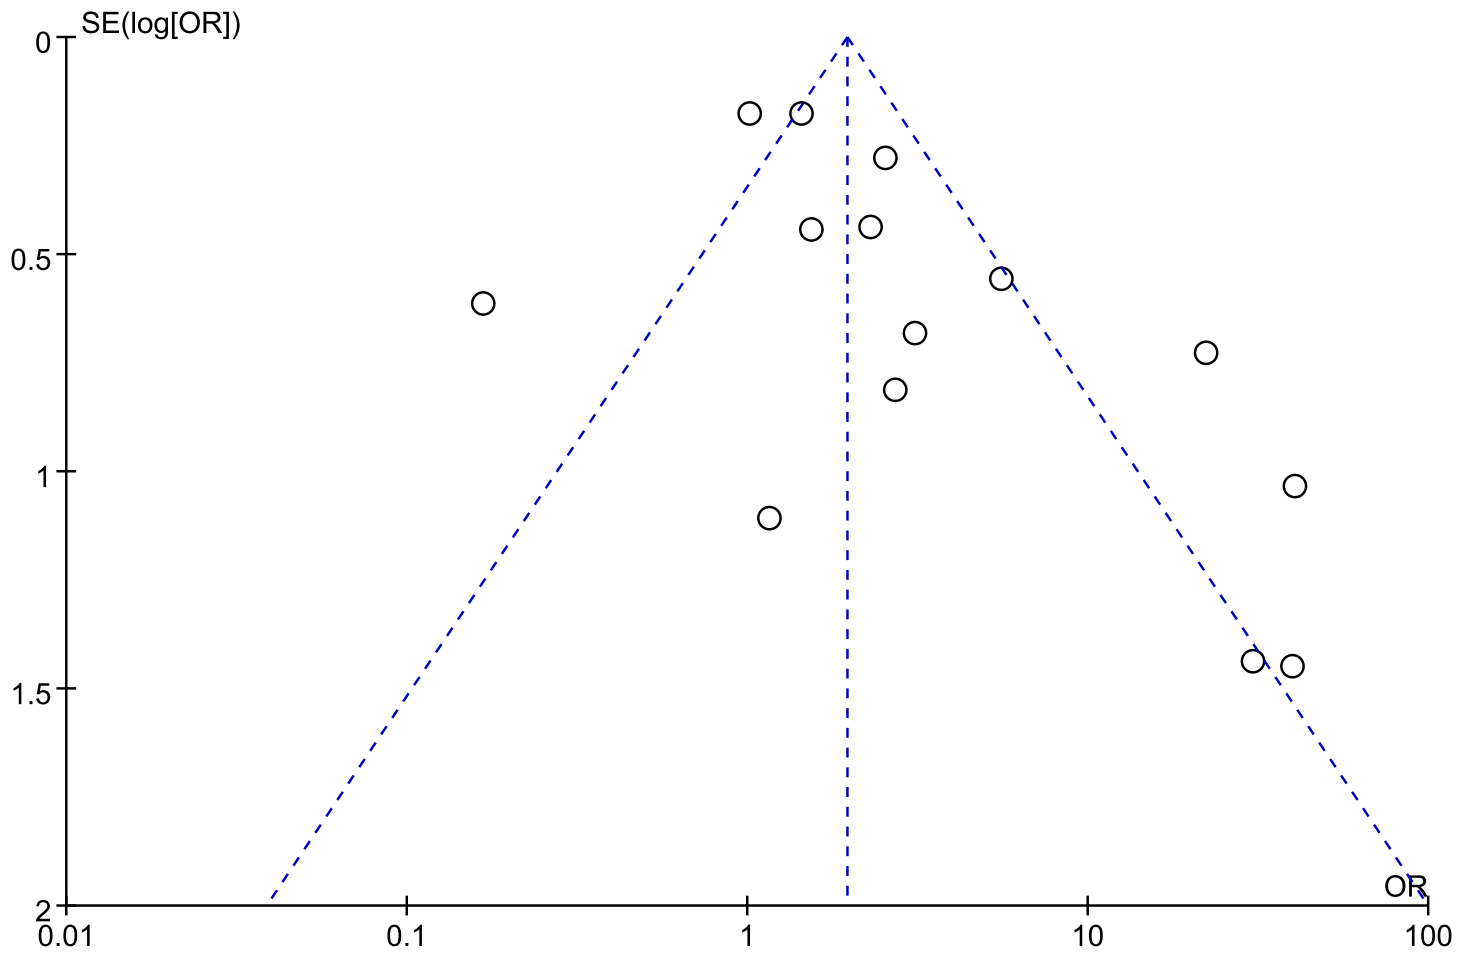

Supplemental Fig. 3B

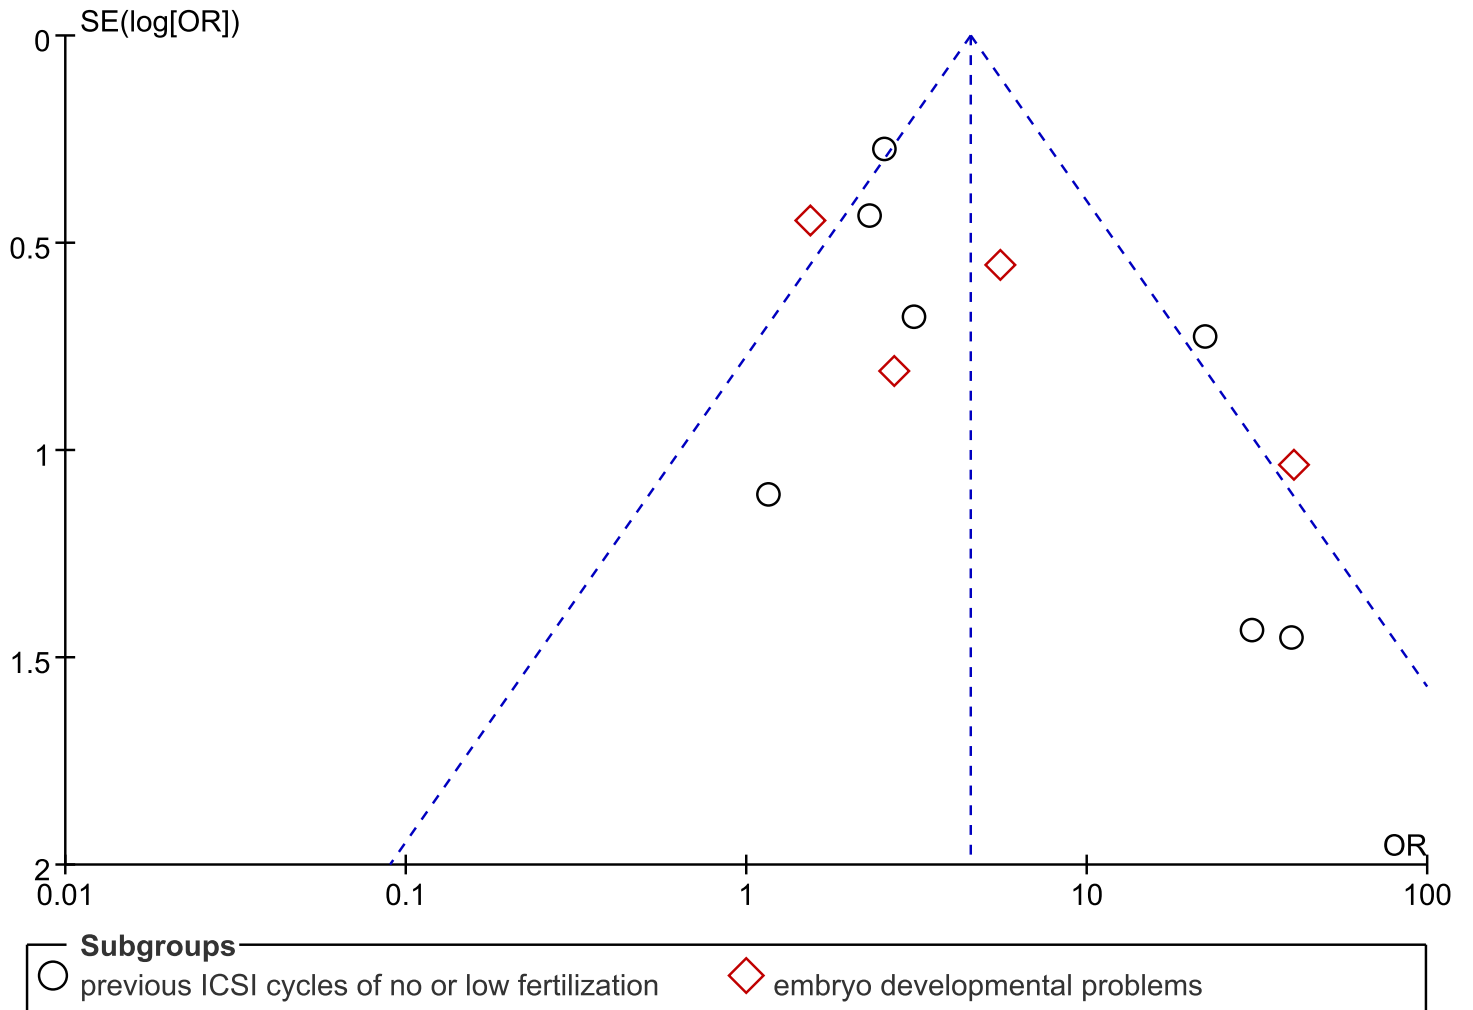

Supplemental Fig. 4A

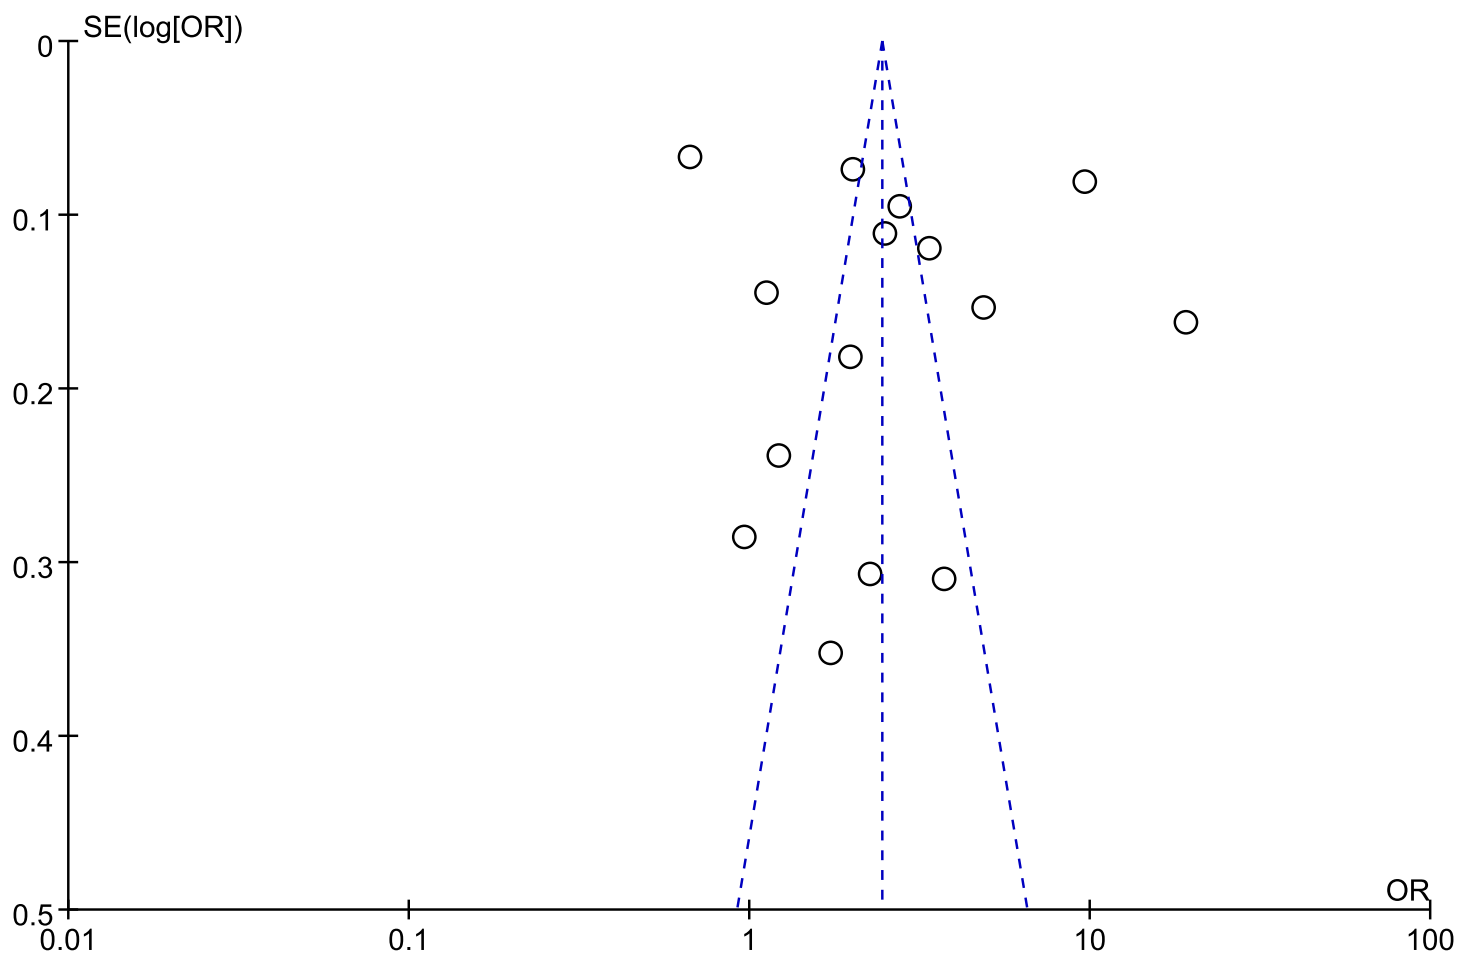

Supplemental Fig. 4B

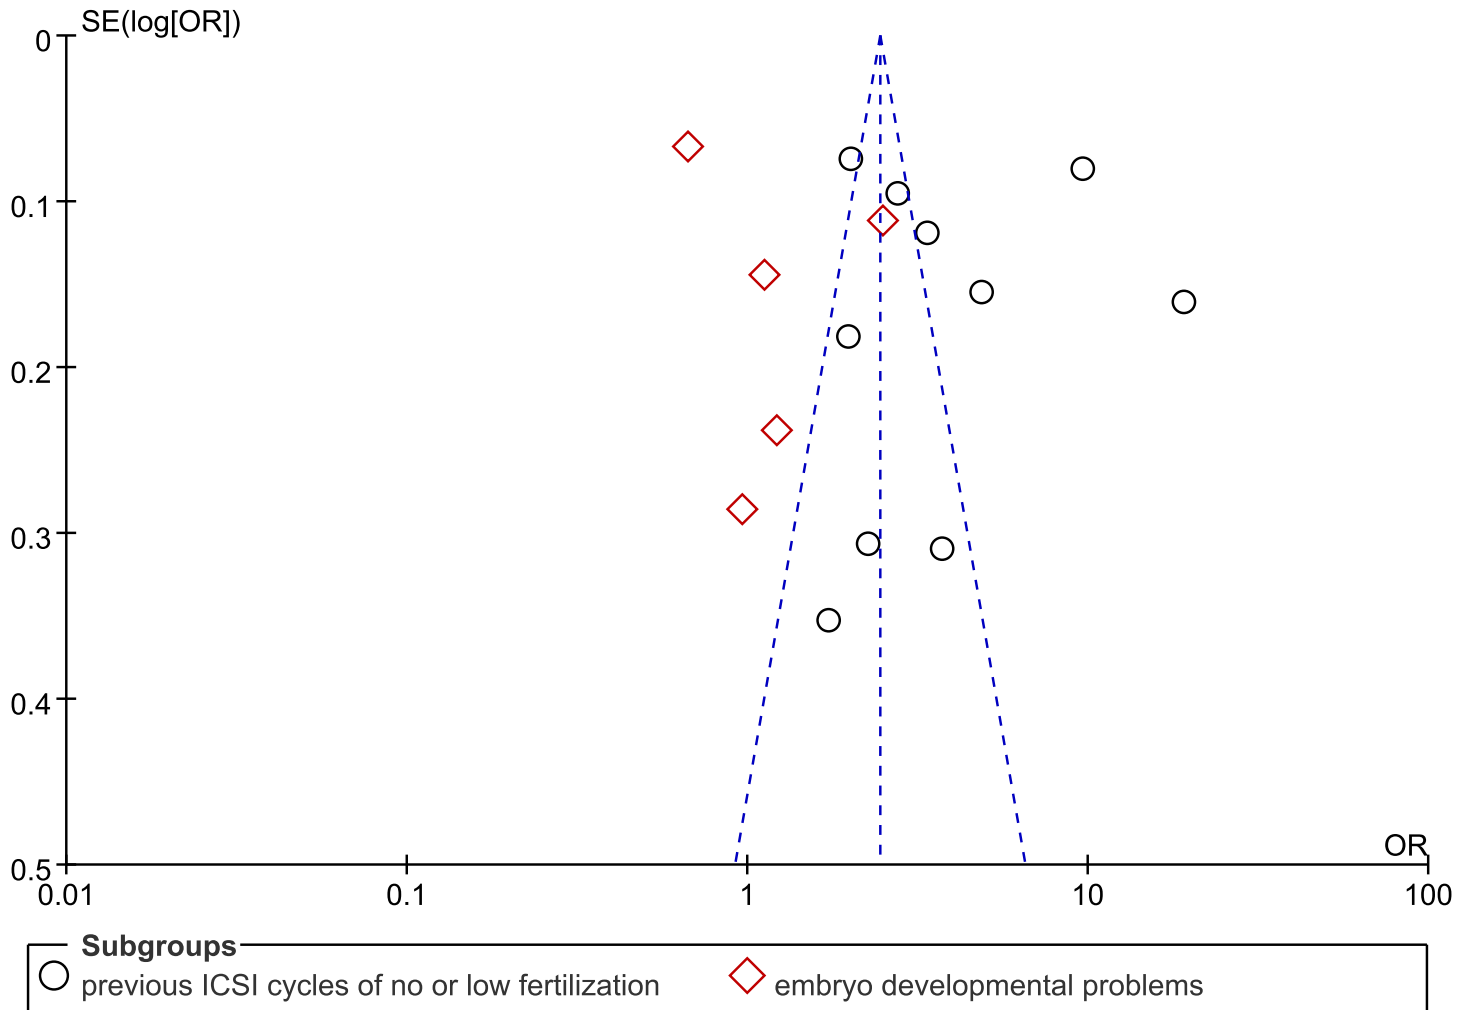

Supplemental Fig. 5

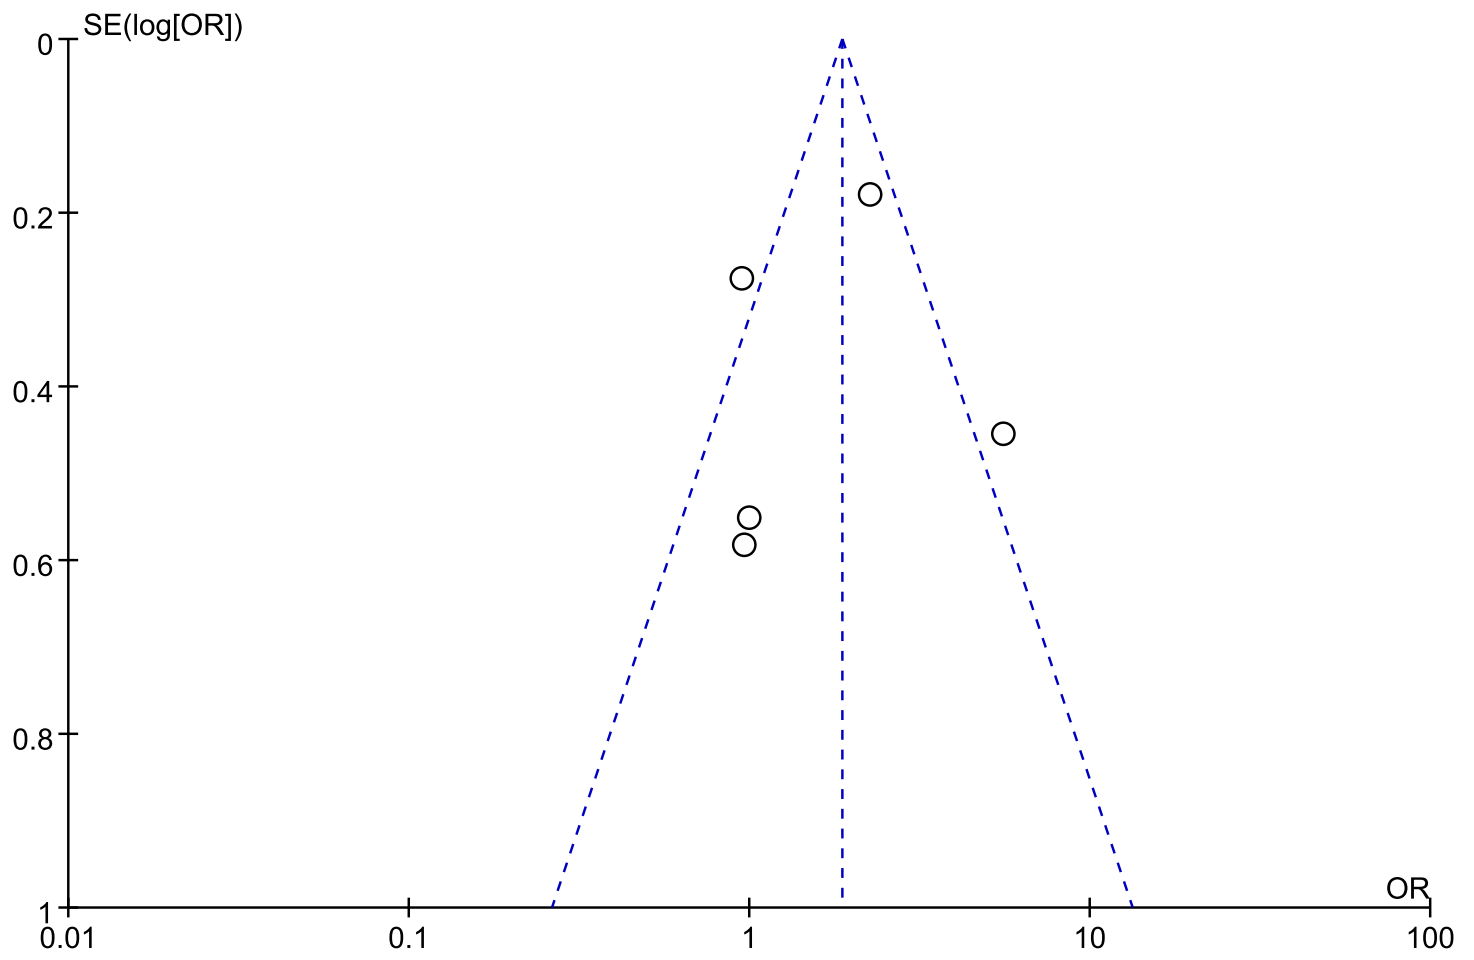



Supplemental Fig. 6

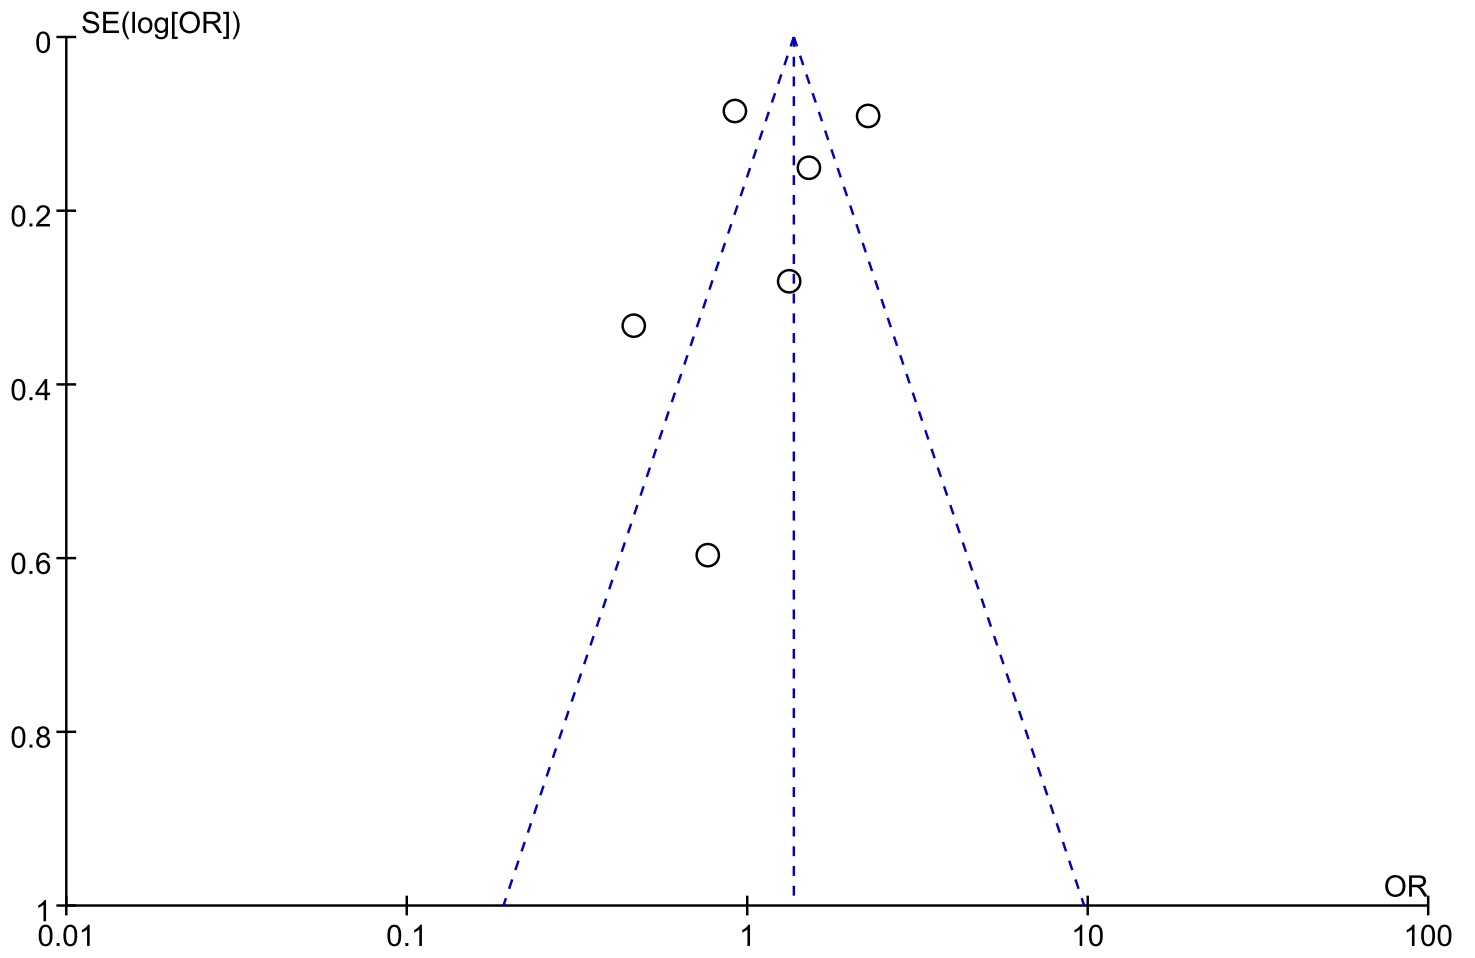

Supplemental Fig. 7

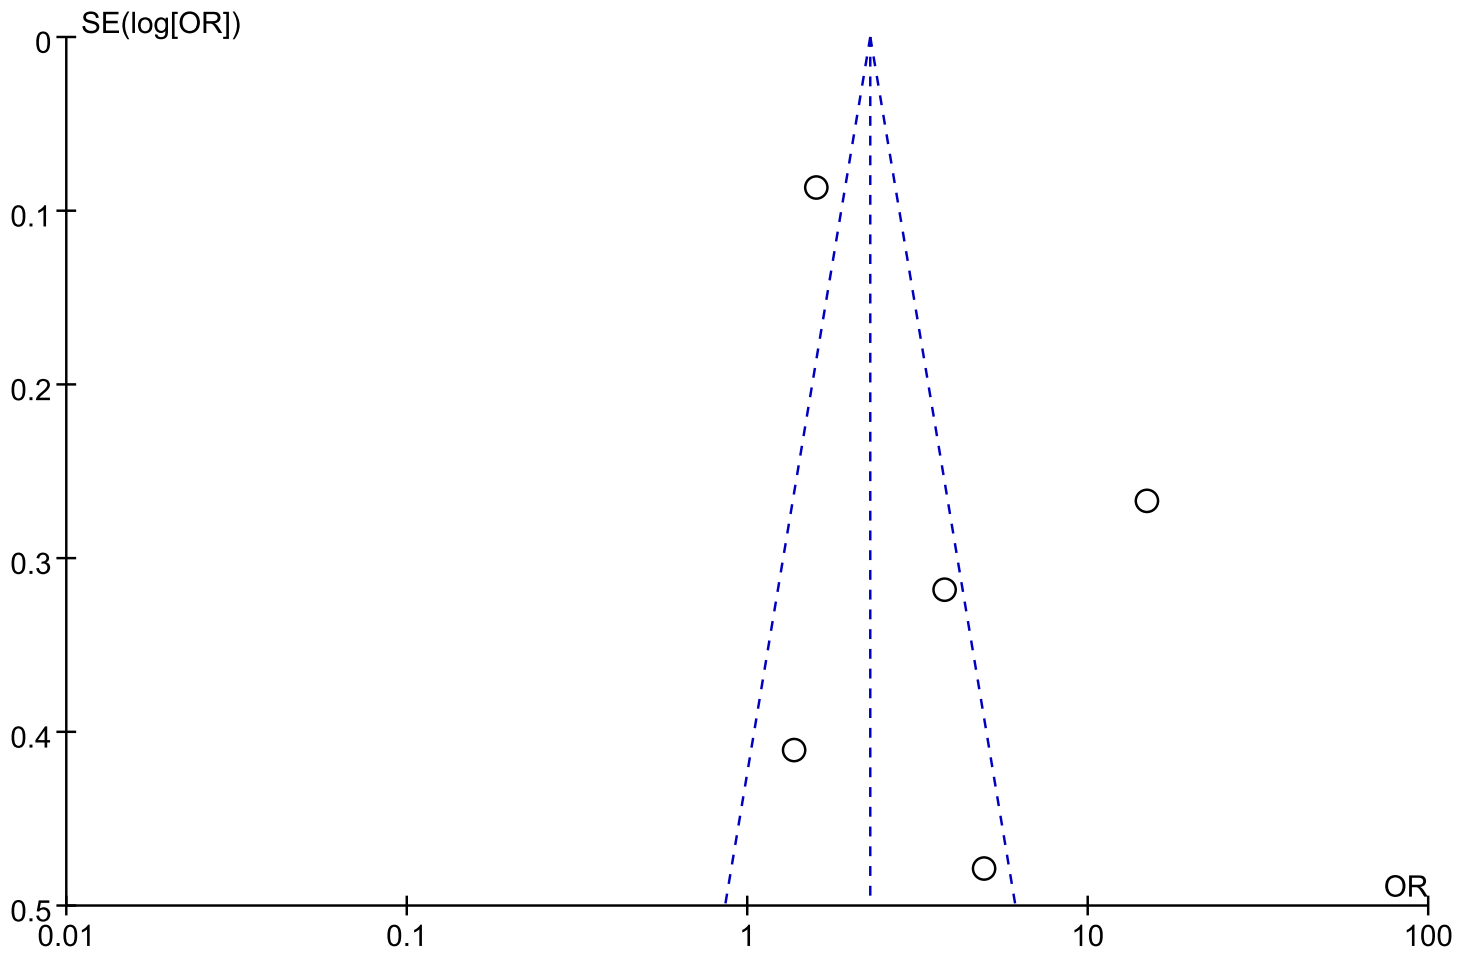

Supplemental Fig. 8A

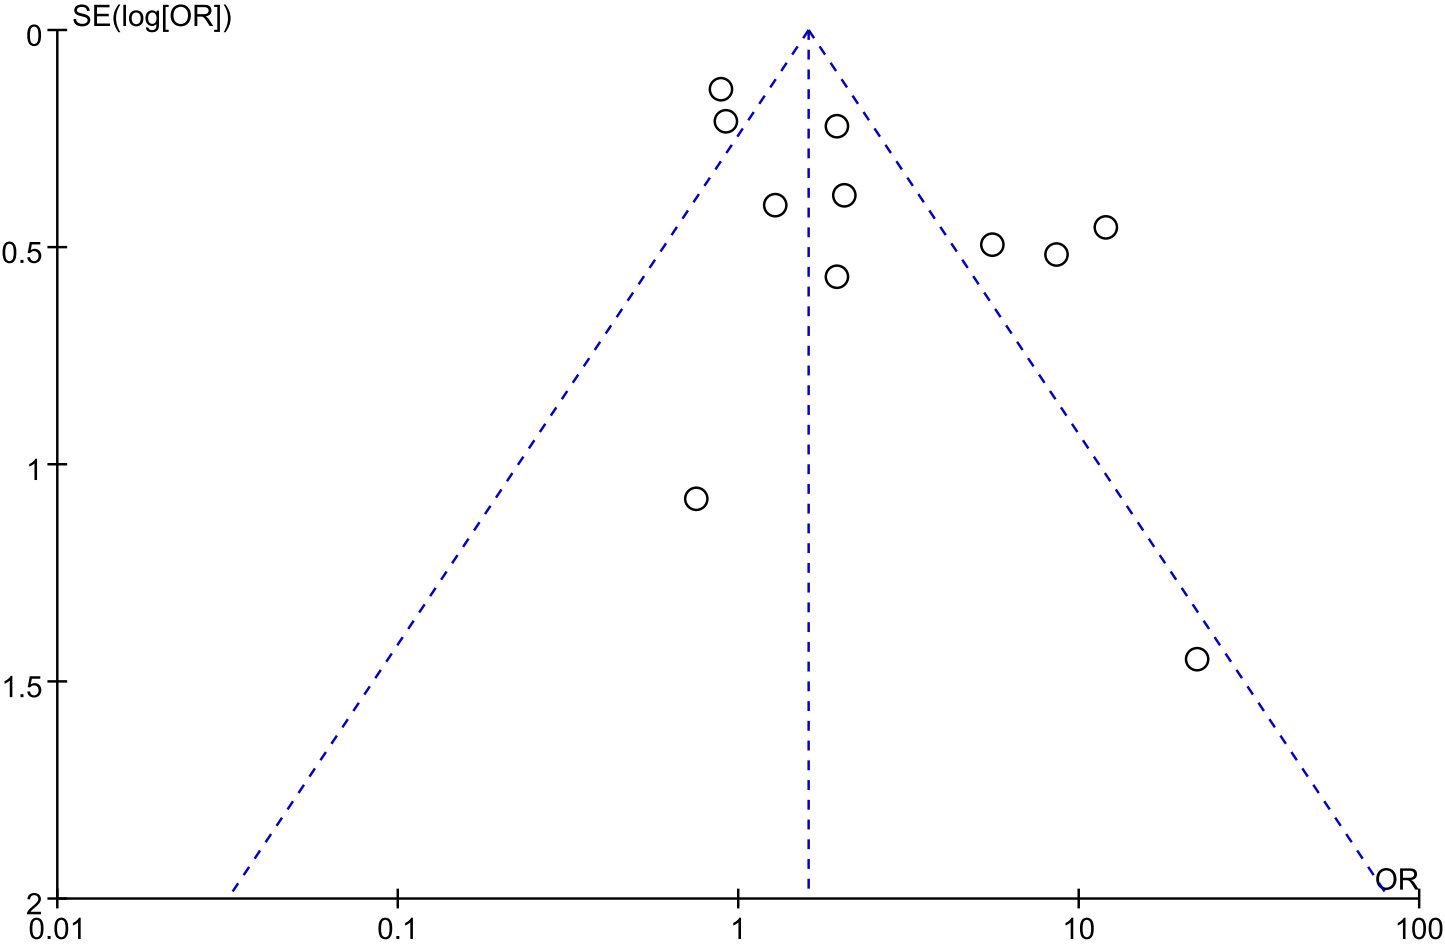

Supplemental Fig. 8B

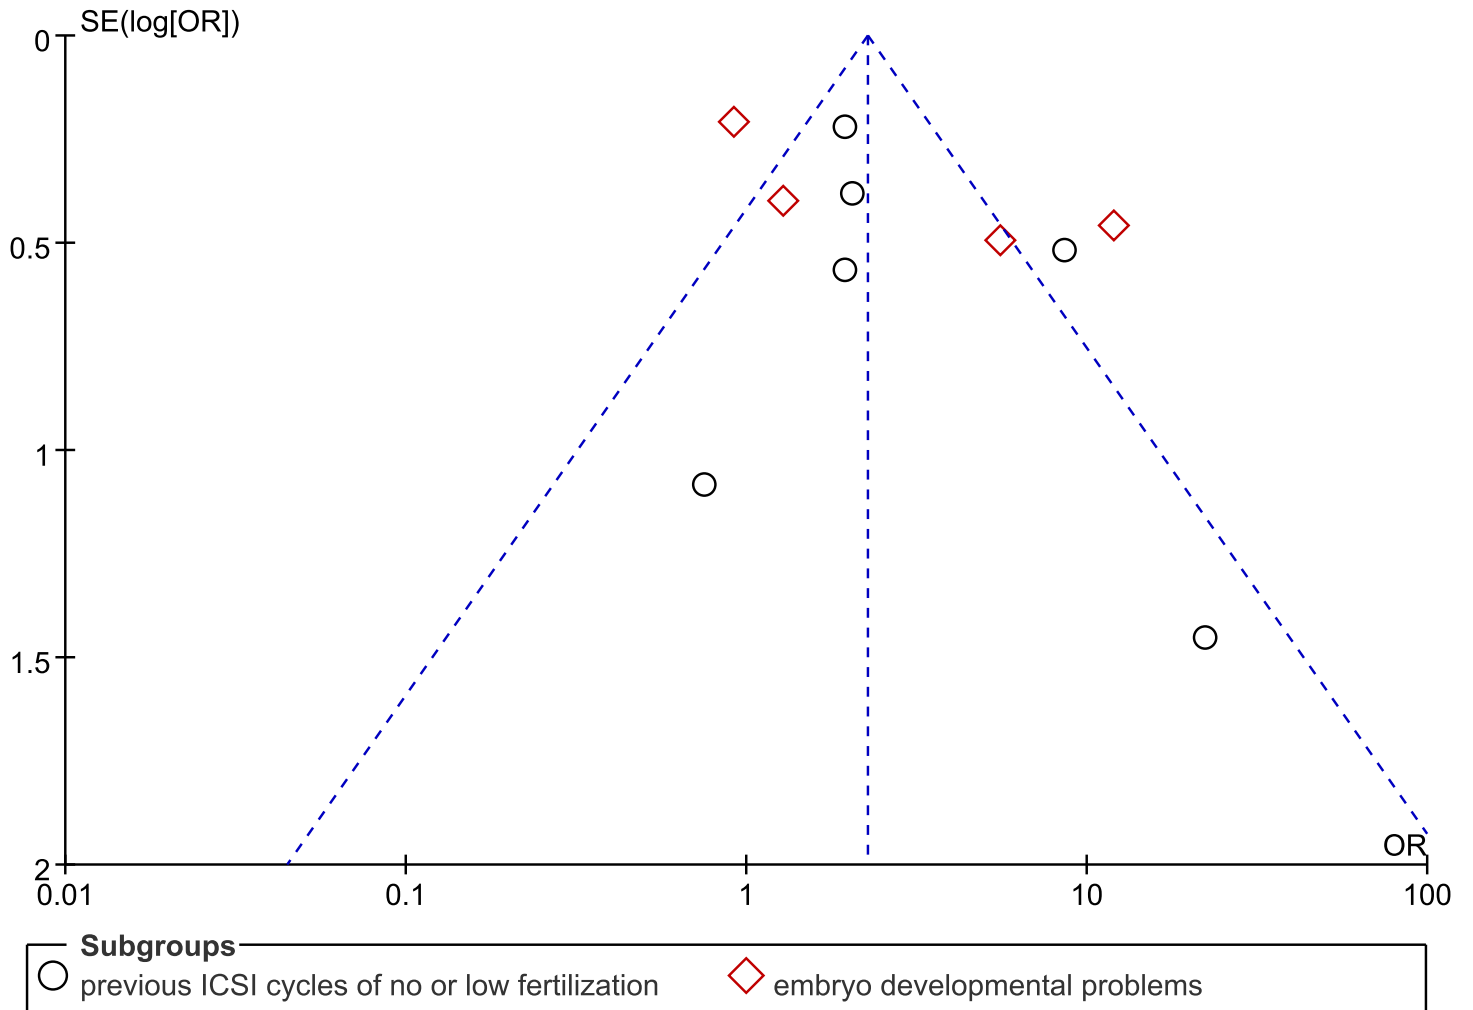

Supplemental Fig. 9

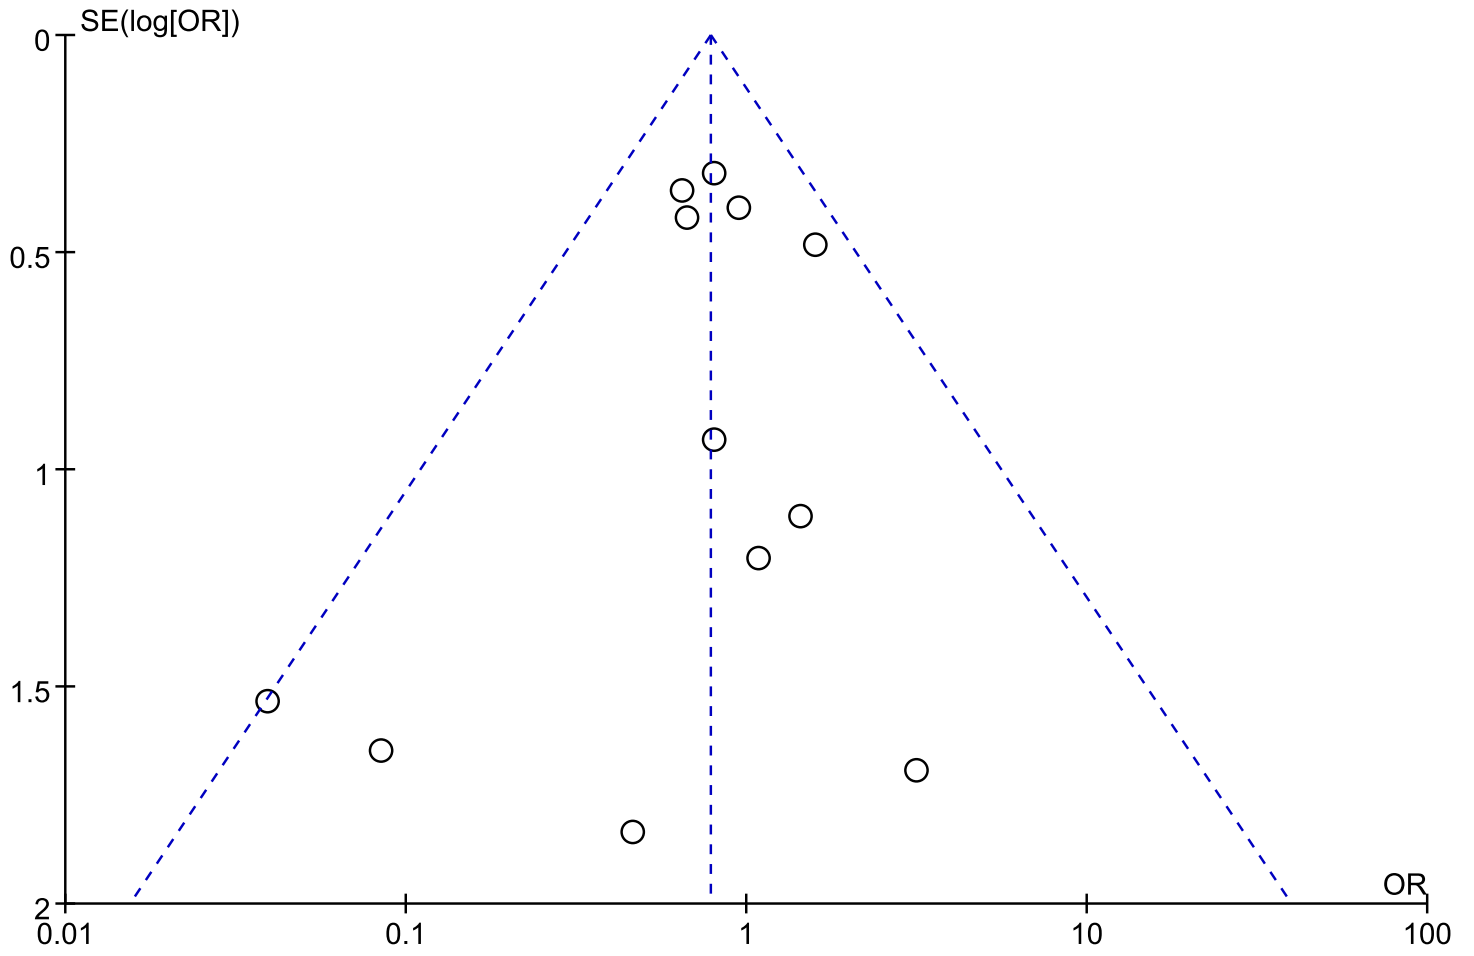

Supplemental Fig. 10A

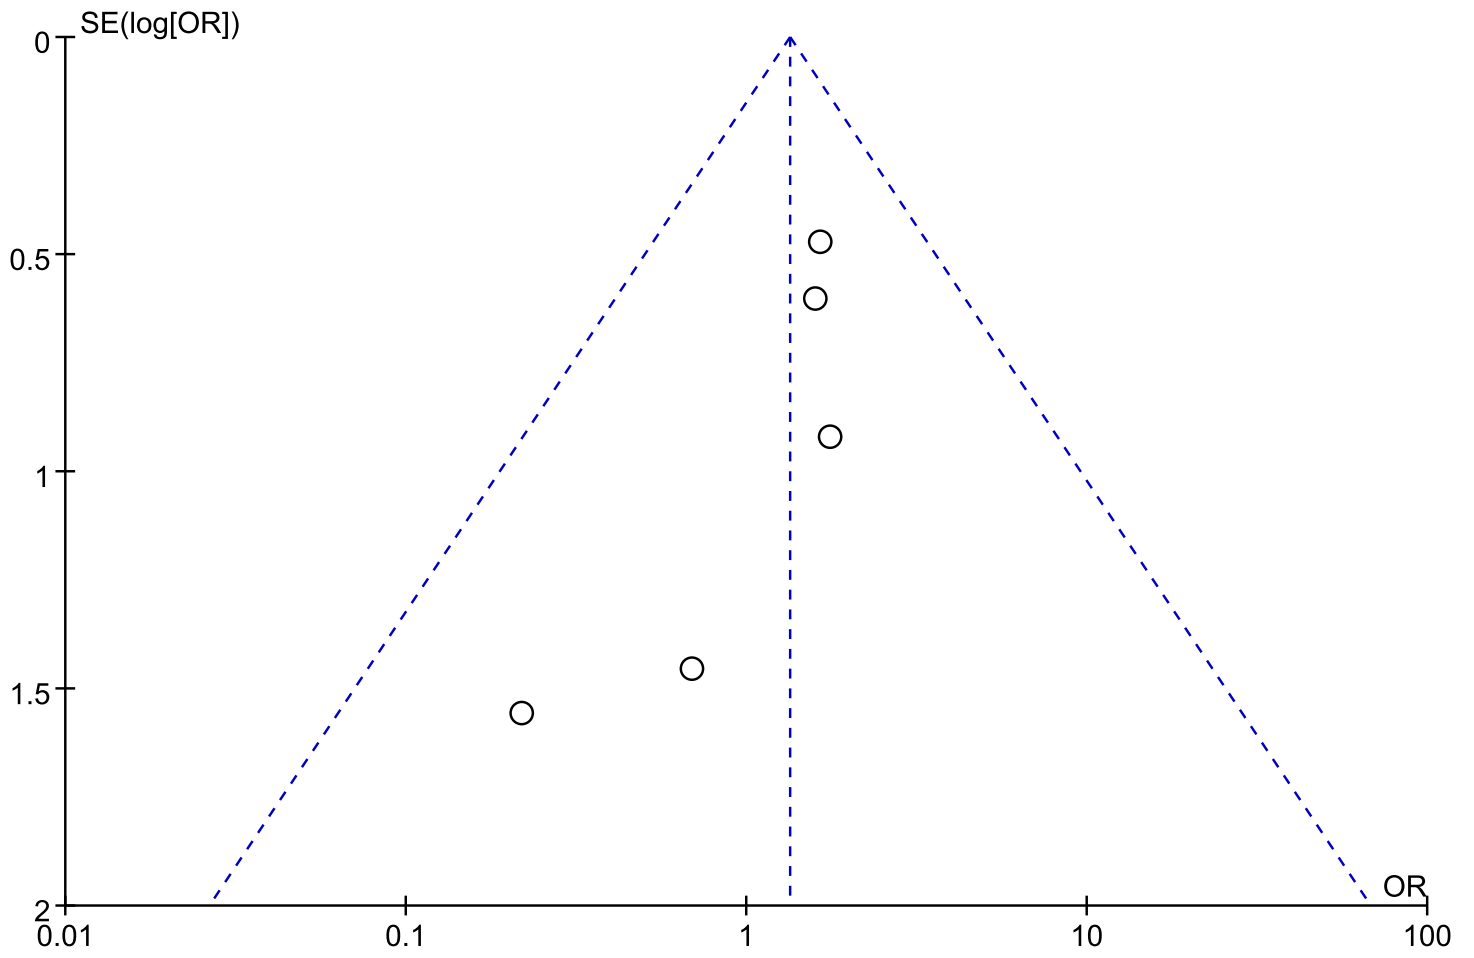

Supplemental Fig. 10B

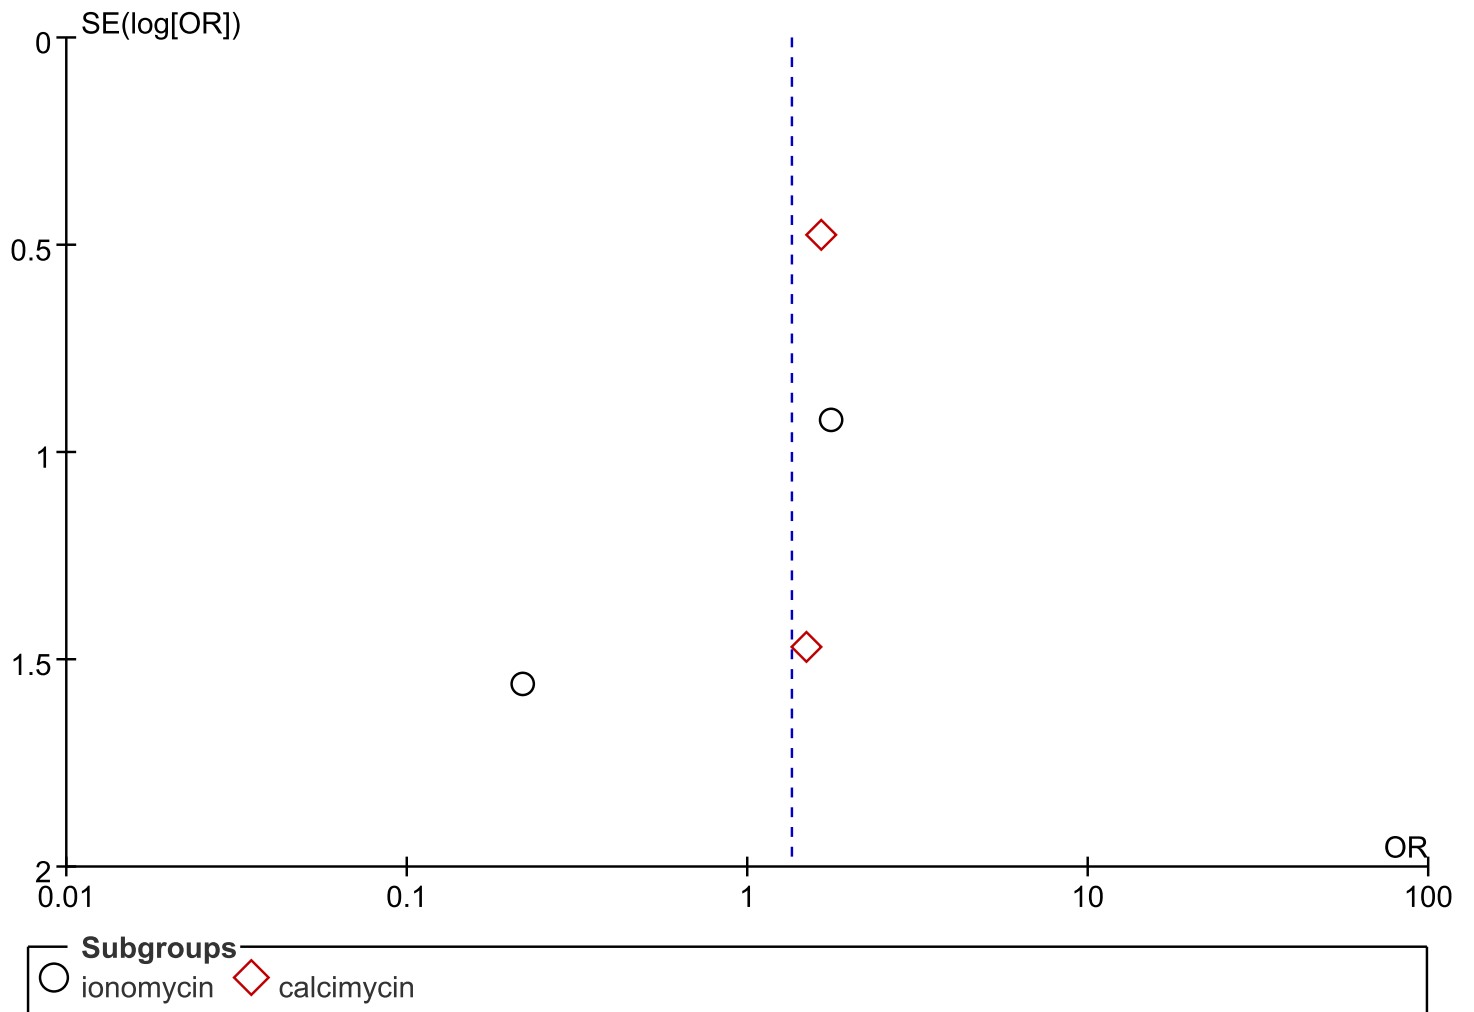

## Funnel plot with pseudo 95% confidence limits

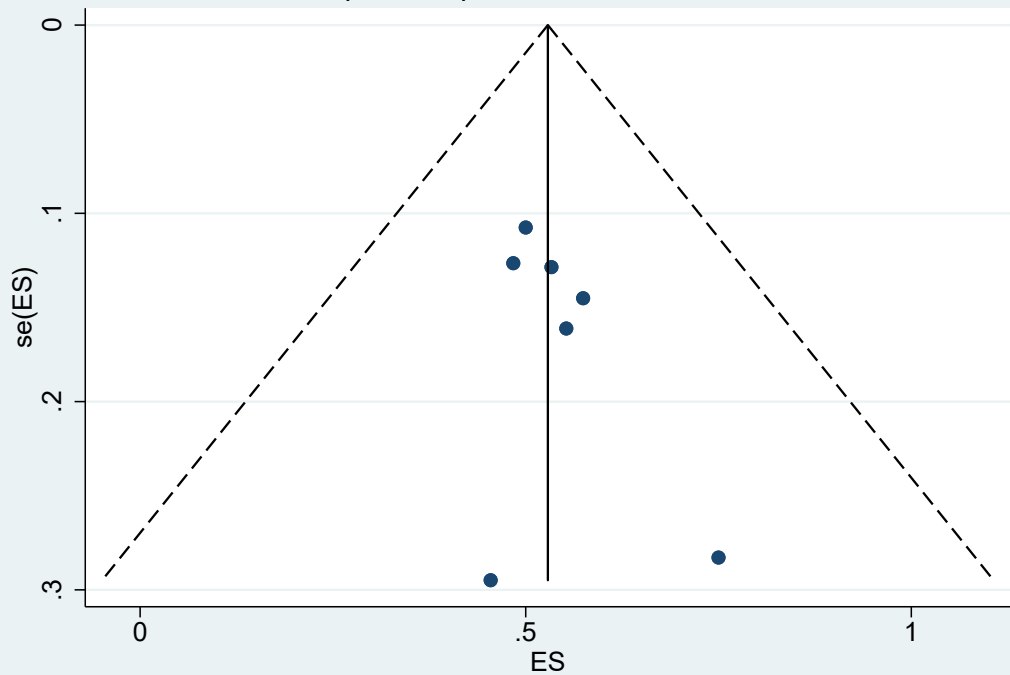

Supplement: Data_Sheet_1.pdf [file Data_Sheet_1.pdf]
