# Supplementary material for: Assisted Oocyte Activation With Calcium Ionophore Improves Pregnancy Outcomes and Offspring Safety in Infertile Patients: A Systematic Review and Meta-Analysis
Source: PubMed Central journal article supplement (PMC8819094; doi:10.3389/fphys.2021.751905), 2022-01-24
Supplement: Table_1.pdf [file Table_1.pdf]

**Supplemental table 1. NOS for the risk of bias and the quality assessment of included studies**

| <b>Author</b> | <b>Year</b> | <b>Selection</b> | <b>Comparability</b> | <b>Outcome</b> | <b>Total score</b> |
|---------------|-------------|------------------|----------------------|----------------|--------------------|
| Li JS         | 2019        | ★★★★             | ★★                   | ★★★            | 9                  |
| Bonte         | 2019        | ★★★              | ★                    | ★★★            | 7                  |
| Li B          | 2019        | ★★               | ★★                   | ★★★            | 7                  |
| Mateizel      | 2018        | ★★               |                      | ★★★            | 5                  |
| Miller        | 2016        | ★★               | ★★                   | ★★★            | 7                  |
| Aydinuraz     | 2016        | ★★★★             | ★★                   | ★★★            | 9                  |
| Hao DY        | 2016        | ★★★★             | ★★                   | ★★★            | 9                  |
| Ebner         | 2015        | ★★★★             | ★                    | ★★★            | 8                  |
| Hee JK        | 2015        | ★★               | ★                    | ★★★            | 6                  |
| Ebner         | 2014        | ★★★★             | ★★                   | ★★★            | 9                  |
| Mateizel      | 2014        | ★★               | ★                    | ★★★            | 6                  |
| Hye JY        | 2013        | ★★★              | ★                    | ★★★            | 7                  |
| Ebner         | 2012        | ★★★★             | ★★                   | ★★★            | 9                  |
| Montag        | 2012        | ★★★              | ★★                   | ★★★            | 8                  |
| Meerschaut,   | 2012        | ★★★★             | ★★                   | ★★★            | 9                  |
| Koichi Kyono, | 2012        | ★★★              | ★                    | ★★★            | 7                  |
| Heindryckx,   | 2008        | ★★★★             | ★                    | ★★★            | 8                  |
